# Supplementary material for: Multiple myeloma immunoglobulin lambda translocations portend poor prognosis
Source: PubMed Central journal article supplement (PMC6478743; doi:10.1038/s41467-019-09555-6), 2019-04-23
Supplement: 41467_2019_9555_MOESM1_ESM.pdf [file 41467_2019_9555_MOESM1_ESM.pdf]

1 **Supplementary Material for:**

2 Multiple myeloma immunoglobulin lambda translocations portend poor prognosis

3 Benjamin G. Barwick<sup>1,2,3</sup>, Paola Neri<sup>4</sup>, Nizar J. Bahlis<sup>4</sup>, Ajay K. Nooka<sup>1,3</sup>, Madhav V. Dhodapkar<sup>1,3</sup>,  
4 David L. Jaye<sup>3,5</sup>, Craig C. Hofmeister<sup>1,3</sup>, Jonathan L. Kaufman<sup>1,3</sup>, Vikas A. Gupta<sup>1,3</sup>, Daniel Auclair<sup>6</sup>,  
5 Jonathan J. Keats<sup>7</sup>, Sagar Lonial<sup>1,3</sup>, Paula M. Vertino<sup>2,3\*#</sup>, Lawrence H. Boise<sup>1,3\*</sup>

6 <sup>1</sup>Department of Hematology and Medical Oncology, Emory University School of Medicine, 1365 Clifton  
7 Rd. NE, Atlanta, GA 30322

8 <sup>2</sup>Department of Radiation Oncology, Emory University School of Medicine, 1701 Uppergate Drive,  
9 Atlanta, GA 30322

10 <sup>3</sup>Winship Cancer Institute, Emory University, 1365 Clifton Rd, Atlanta, GA 30322

11 <sup>4</sup>Charbonneau Cancer Research Institute, University of Calgary, 3330 Hospital Drive, Calgary, AB, T2N  
12 4N1

13 <sup>5</sup>Department of Pathology and Laboratory Medicine, Emory University School of Medicine, Atlanta, GA  
14 30322

15 <sup>6</sup>Multiple Myeloma Research Foundation, 383 Main Avenue, 5th Floor, Norwalk, CT 06851

16 <sup>7</sup>Translational Genomics Research Institute, 445 North Fifth Street, Phoenix, AZ, 85004

17 \*Address correspondence to:

18 Paula M. Vertino, Ph.D.

19 [pvertin@emory.edu](mailto:pvertin@emory.edu)

20 (404) 778-3119

21 and

22 Lawrence H. Boise, Ph.D.

23 [lboise@emory.edu](mailto:lboise@emory.edu)

24 (404) 778-4724

25 # Present address: Department of Biomedical Genetics, University of Rochester School of Medicine  
26 and Dentistry, Rochester, NY, 14642

27

# Figure S1

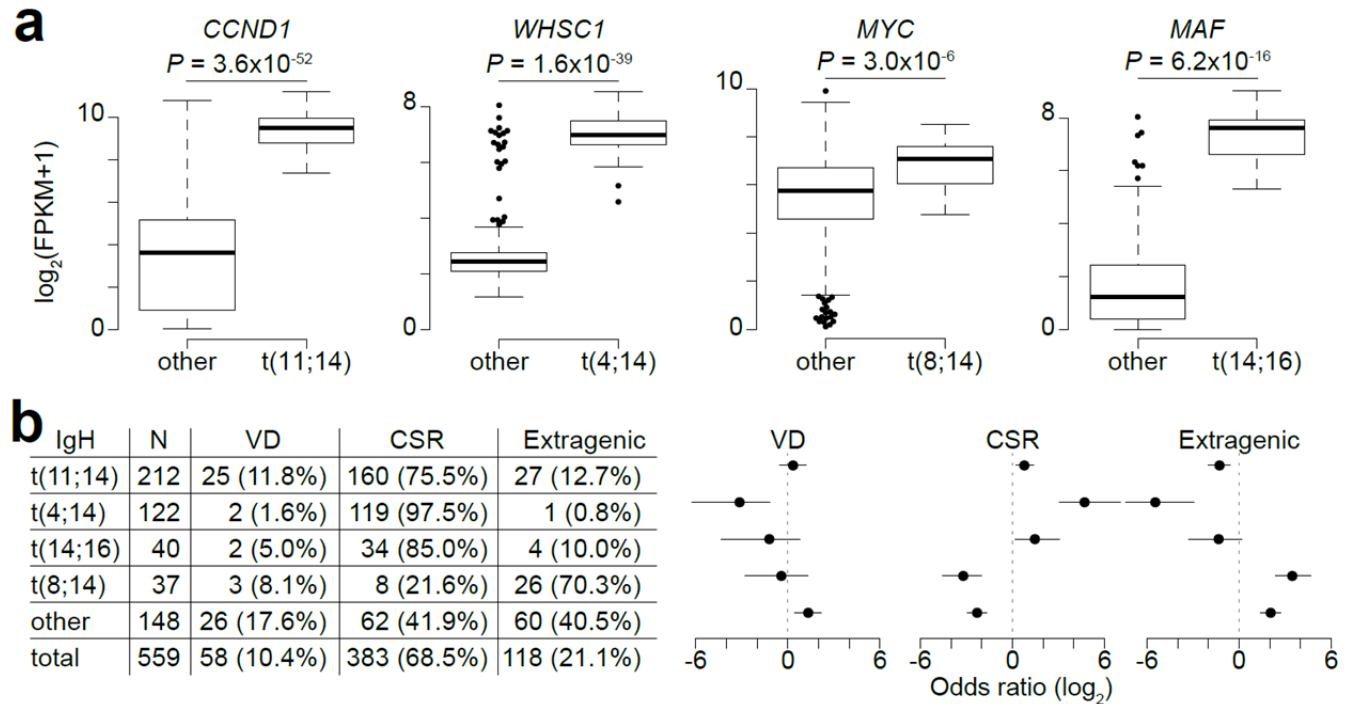

28  
 29 **Figure S1.** IgH translocations correspond with aberrant gene expression. **a** Expression of translocated genes in  
 30 t(IgH) myeloma. Boxplots show the median and quartiles with the whiskers extending to the most extreme data  
 31 point within 1.5 times the interquartile range. *P*-values are calculated using the Mann-Whitney U-test. **b** Table of  
 32 IgH location that distinct IgH translocations occur segregated by the variable and diversity (VD), class switch  
 33 recombination (CSR) (+/-2.5kb), and extragenic regions. Note: individual patients may have more than one  
 34 reported translocation. The odds-ratio of each translocation type are plotted (right) with 95% confidence  
 35 intervals shown.

# Figure S2

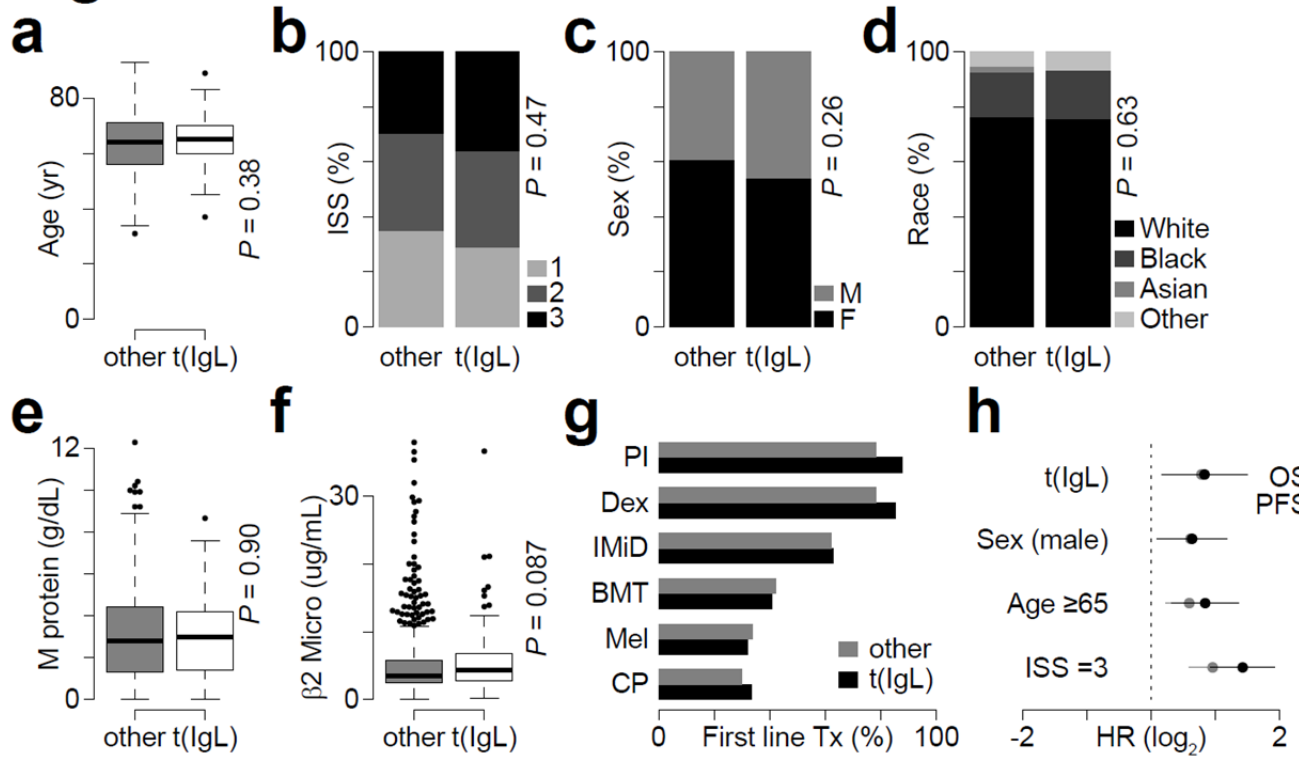

36  
 37 **Figure S2.** Patients with t(IgL) have similar characteristics and clinical features as other myeloma patients.  
 38 Patient (a) age in years, (b) stage (ISS), (c) sex, (d) race, (e) serum M-protein, and (f) serum  $\beta 2$ -microglobulin are  
 39 shown for non-t(IgL) and t(IgL) patients. g Therapeutic agents used in treatment regimens including proteasome  
 40 inhibitors (PI), dexamethasone (Dex), immunomodulatory imide drugs (IMiD), autologous bone marrow  
 41 transplant (BMT), melphalan (Mel), and cyclophosphamide (CP) are shown for t(IgL) and other myelomas. h OS  
 42 (black) and PFS (gray) hazard ratios (HR) determined by multivariate Cox proportional hazards analysis of t(IgL)  
 43 with prognostic clinical factors. 95% confidence intervals are shown.  $P$ -values represent significance determined  
 44 by Mann-Whitney U-test (a, e, f) or Fisher's exact test (b, c, d). Boxplots (a, e, f) show the median and quartiles  
 45 with the whiskers extending to the most extreme data point within 1.5 times the interquartile range.

46

# Figure S3

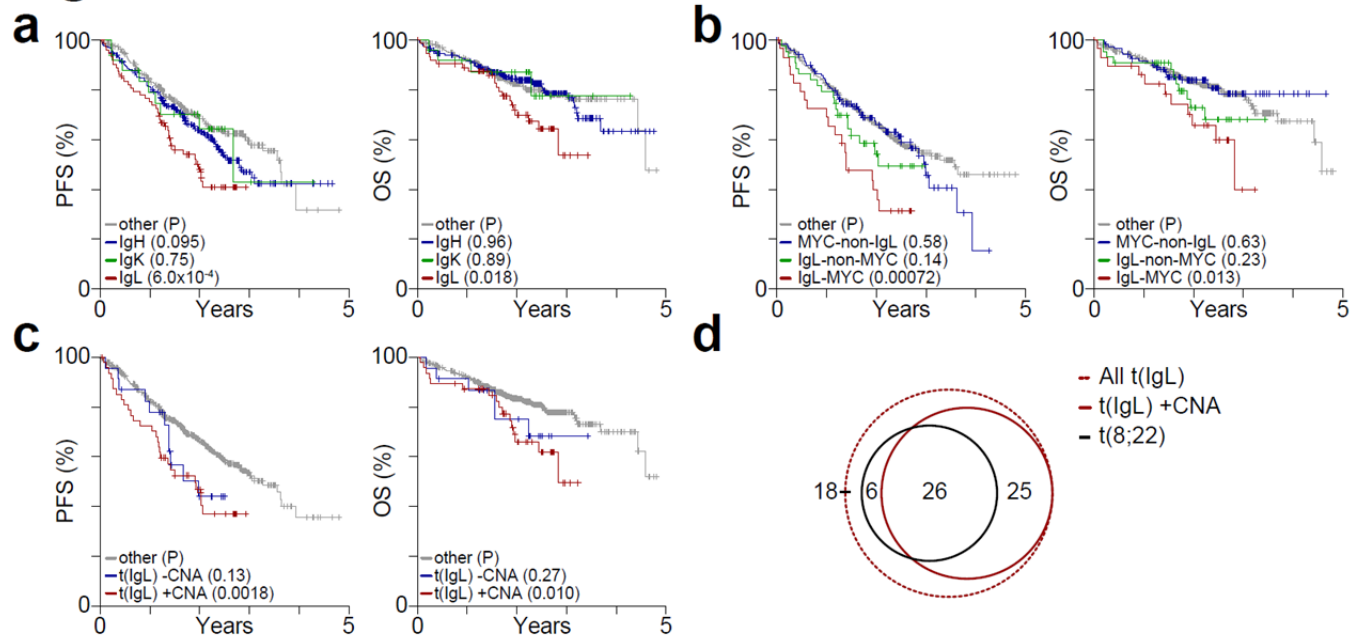

47

48 **Figure S3.** IgL translocations are associated with poor prognosis. **a** Progression-free (PFS; left) and overall  
 49 survival (OS; right) for patients stratified by immunoglobulin translocation: other (N=383), IgH (N=304), IgK  
 50 (N=30), IgL (N=78). **b** PFS (left) and OS (right) for patients stratified by IgL and MYC translocations: other  
 51 (N=580), MYC-non-IgL (N=137), IgL-non-MYC (N=46), IgL-MYC (N=32). **c** PFS (left) and OS (right) for patients  
 52 stratified by IgL-translocation with (N=51) and without (N=24) an IgL copy number alteration (CNA) as well as  
 53 those with no IgL-translocation (N=702). **d** Venn diagram of all t(IgL) samples (dashed red), t(IgL) samples with a  
 54 focal amplification (red; t(IgL) +CNA), and t(8;22) samples. All samples with structural variant data (N=795) were  
 55 used in parts **a** and **b**, and all samples with structural variant and copy number data (N=777) were used in parts **c**  
 56 and **d**. P-values, shown in parenthesis in parts **a-c**, were calculated using a Cox proportional hazards Wald's test  
 57 and denote significant differences in survival relative to the 'other' group.

58

## Figure S4

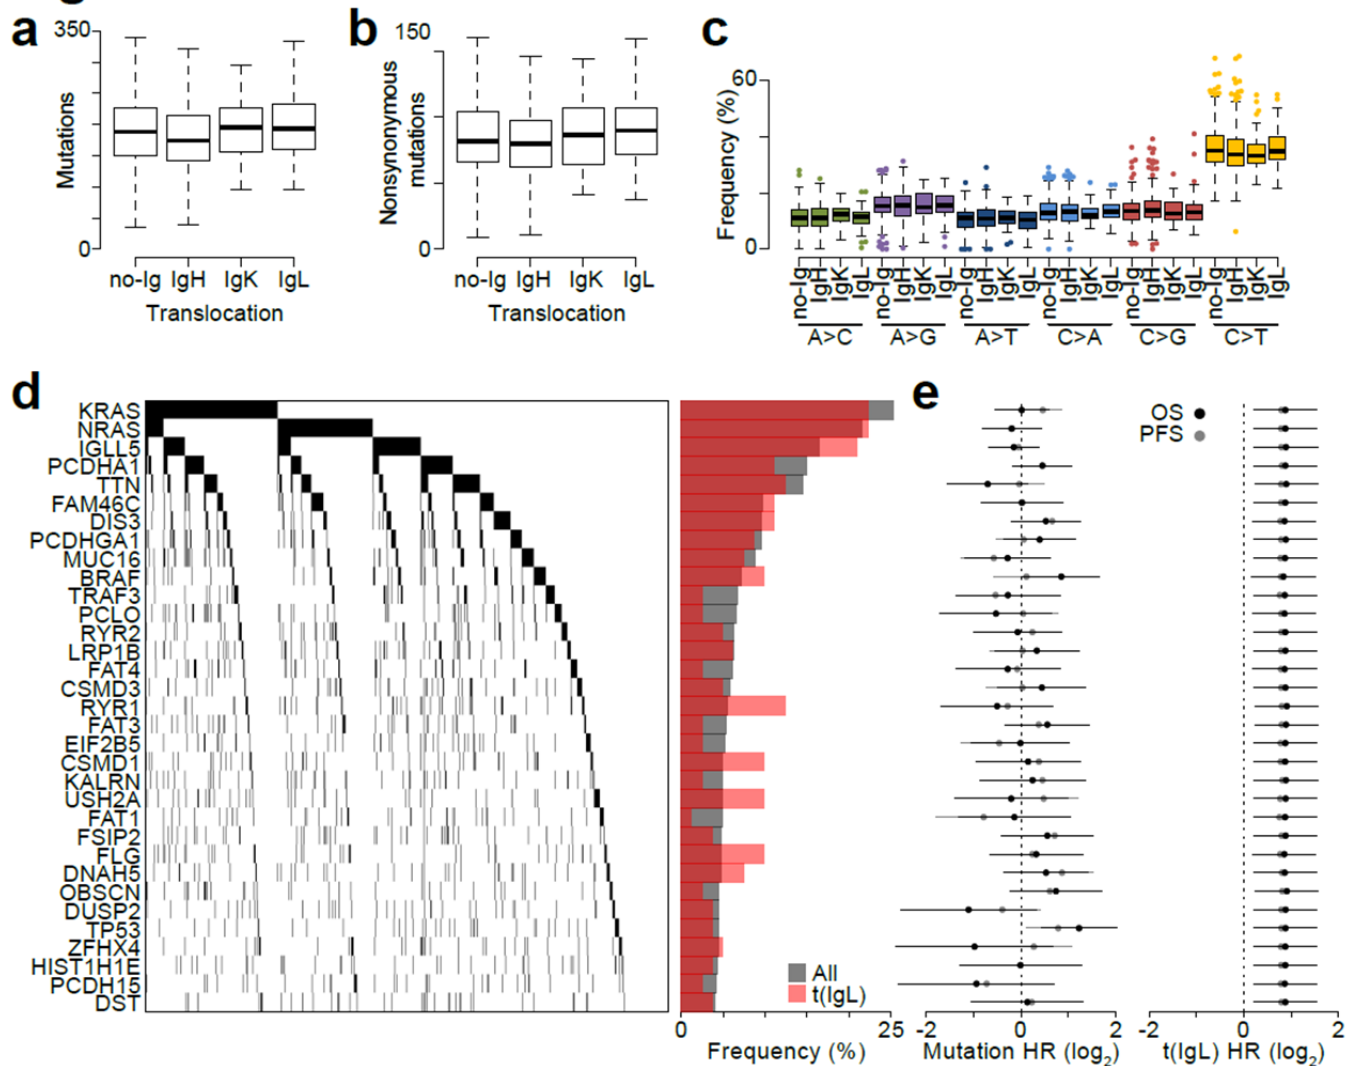

60  
 61 **Figure S4.** IgL translocations do not correspond with tumor-specific mutations. **a** Number of total mutations in  
 62 newly diagnosed myelomas with no immunoglobulin translocation (no-Ig), or an IgH, IgK, or IgL translocation. **b**  
 63 Number of nonsynonymous mutations in the same myelomas as part (a). **c** Frequency of mutational repertoire  
 64 in the same myelomas as part (a). **d** Waterfall plot of myeloma nonsynonymous mutations for genes with a  
 65 frequency at least 4% in newly diagnosed myelomas (left). The frequency of mutations for each gene is shown  
 66 (right) for both the total population (gray) and t(IgL) myeloma (red). **e** Progression-free (PFS; gray) and overall  
 67 survival (OS; black) hazard ratios (HR) are shown for each mutation (middle) in a bivariate analysis including  
 68 t(IgL) (right). HR 95% confidence intervals of are shown. Data include all newly diagnosed myeloma samples with  
 69 long-insert and exome sequencing in both tumor and normal samples (N=783), which includes patients with no-  
 70 Ig translocation (N=377), IgH (N=298), IgK (N=30), and IgL (N=78) translocations. Only mutation in non-  
 71 immunoglobulin regions are analyzed. Boxplots (a-c) show the median and quartiles with the whiskers extending  
 72 to the most extreme data point within 1.5 times the interquartile range.

73

## Figure S5

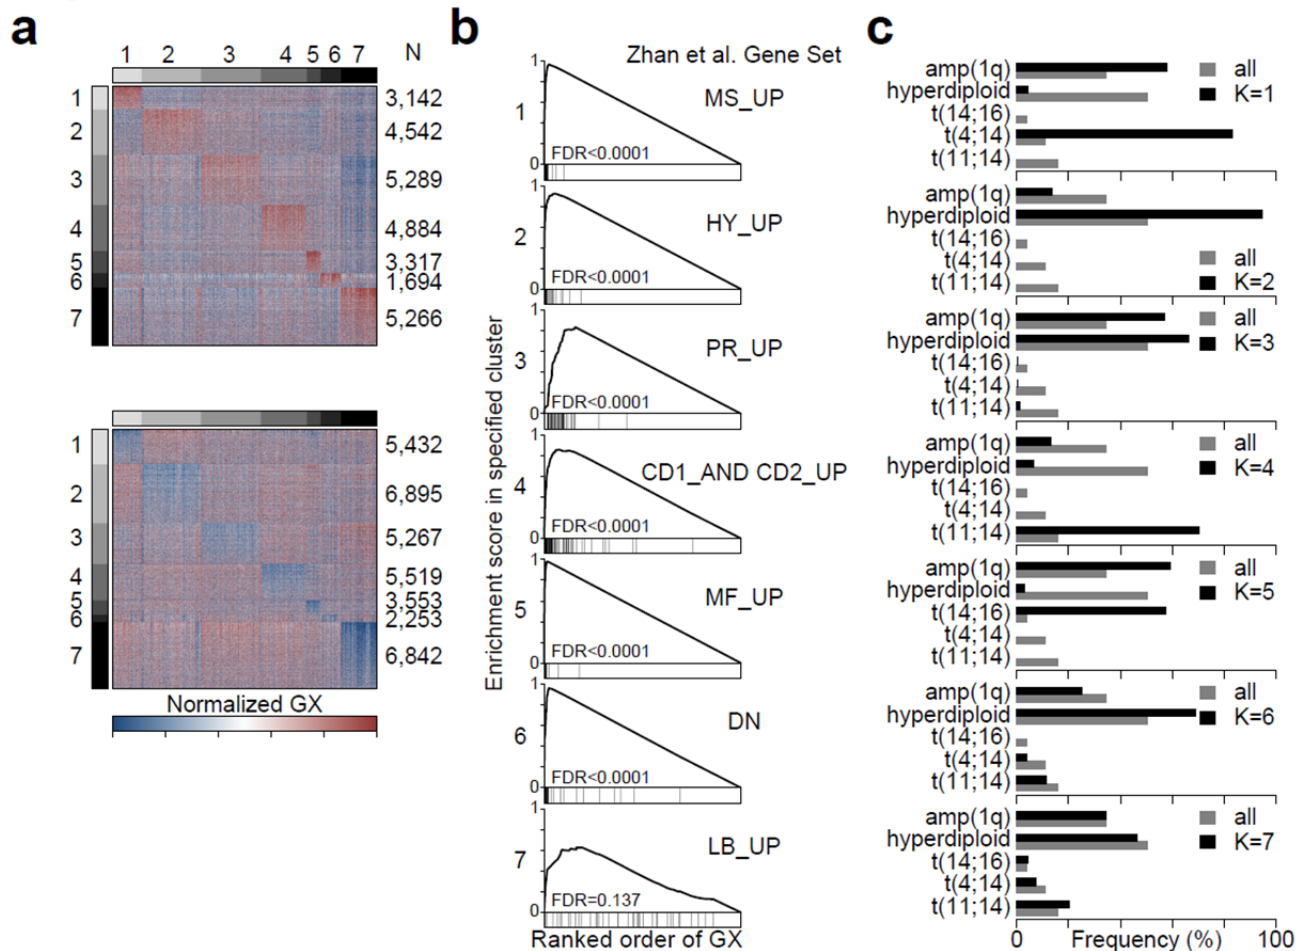

75  
 76 **Figure S5.** Myeloma gene expression subtypes. **a** Heatmap of genes up- (top) and down-regulated (bottom) in  
 77 each expression subgroup. The number of genes in each category are denoted on the right. Genes found to be  
 78 significantly regulated in multiple subtypes were plotted in the subtype where their significance was greatest. **b**  
 79 Gene set enrichment analysis of the most enriched gene set from Zhan et al.<sup>24</sup>. Enrichment score is shown on  
 80 the y-axis and the x-axis is a ranked order of gene expression changes from most upregulated (left) to most  
 81 downregulated (right) in the given expression subtype. **c** Frequency of genetic translocations and copy number  
 82 alterations in each subtype relative to total patients.

83

# Figure S6

**a**

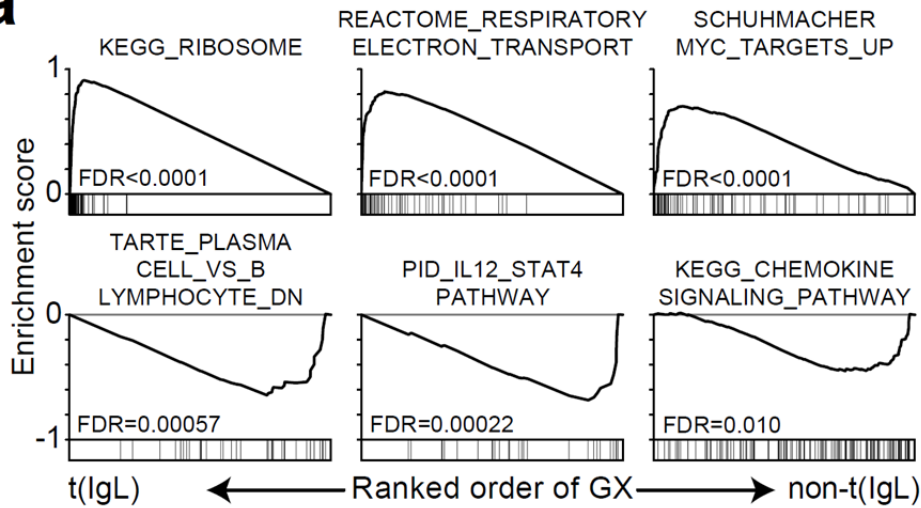

84

**b**

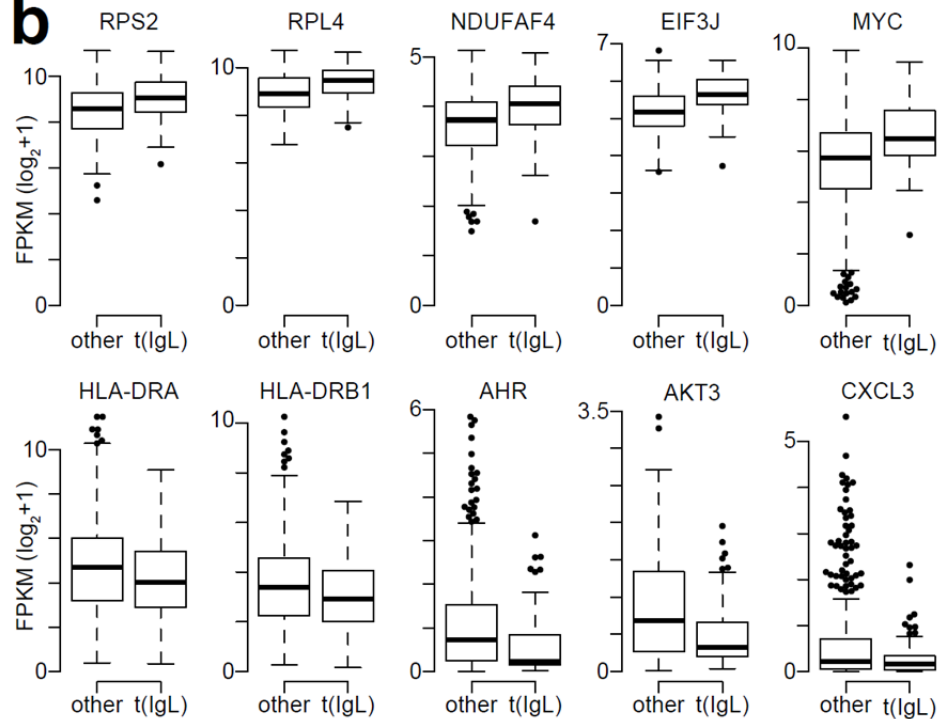

85

86 **Figure S6.** Gene expression changes coincident with t(IgL). **a** Gene set enrichment analysis of gene sets enriched  
 87 (top) or depleted (bottom) in t(IgL) myeloma. Enrichment score is shown by the ranked order of gene expression  
 88 changes from most upregulated in t(IgL) (left) to most down-regulated (right). **b** Examples of genes differentially  
 89 expressed from the above genes sets including both upregulated (top) and downregulated (bottom) genes in  
 90 t(IgL) myeloma relative to others. Boxplots show the median and quartiles with the whiskers extending to the  
 91 most extreme data point within 1.5 times the interquartile range.

# Figure S7

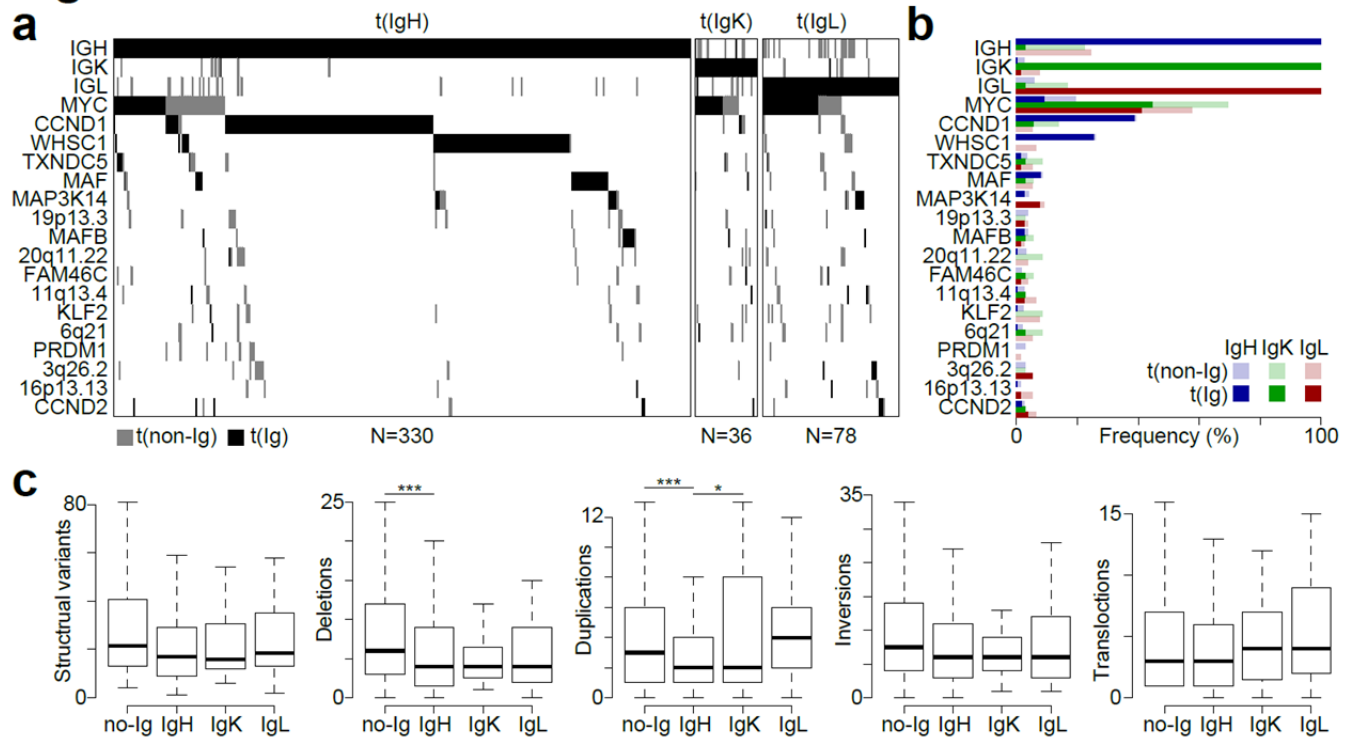

92

93 **Figure S7.** Structural variants in myeloma with immunoglobulin (Ig) translocations. **a** Waterfall plot of IgH (left),  
 94 IgK (middle), and IgL (right) translocated myeloma with other translocations present in  $\geq 2\%$  of the newly  
 95 diagnosed population. Both translocations directly to the respective Ig locus [t(Ig); black] and those that co-  
 96 occur and are not translocated to the Ig locus [t(non-Ig); gray] are shown. **b** The frequency of IgH (blue), IgK  
 97 (green) and IgL (red) translocations are shown for loci as in (a). t(Ig) translocations are shown in opaque colors  
 98 and t(non-Ig) translocations are shown in translucent colors (see key bottom right). **c** Number of total structural  
 99 variants (left), deletions (mid left), duplications (middle), inversions (mid right), and translocations (right)  
 100 in myeloma with no-Ig (N=288), IgH (N=304), IgK (N=23), or IgL (N=54) translocations. Only myelomas with at least  
 101 one translocation are shown and those with multiple Ig translocations are removed. \* $P < 0.05$ , \*\* $P < 0.01$ , \*\*\* $P$   
 102  $< 0.001$  analysis of variance with Tukey's post-hoc test. Boxplots show the median and quartiles with the  
 103 whiskers extending to the most extreme data point within 1.5 times the interquartile range.



# Figure S8

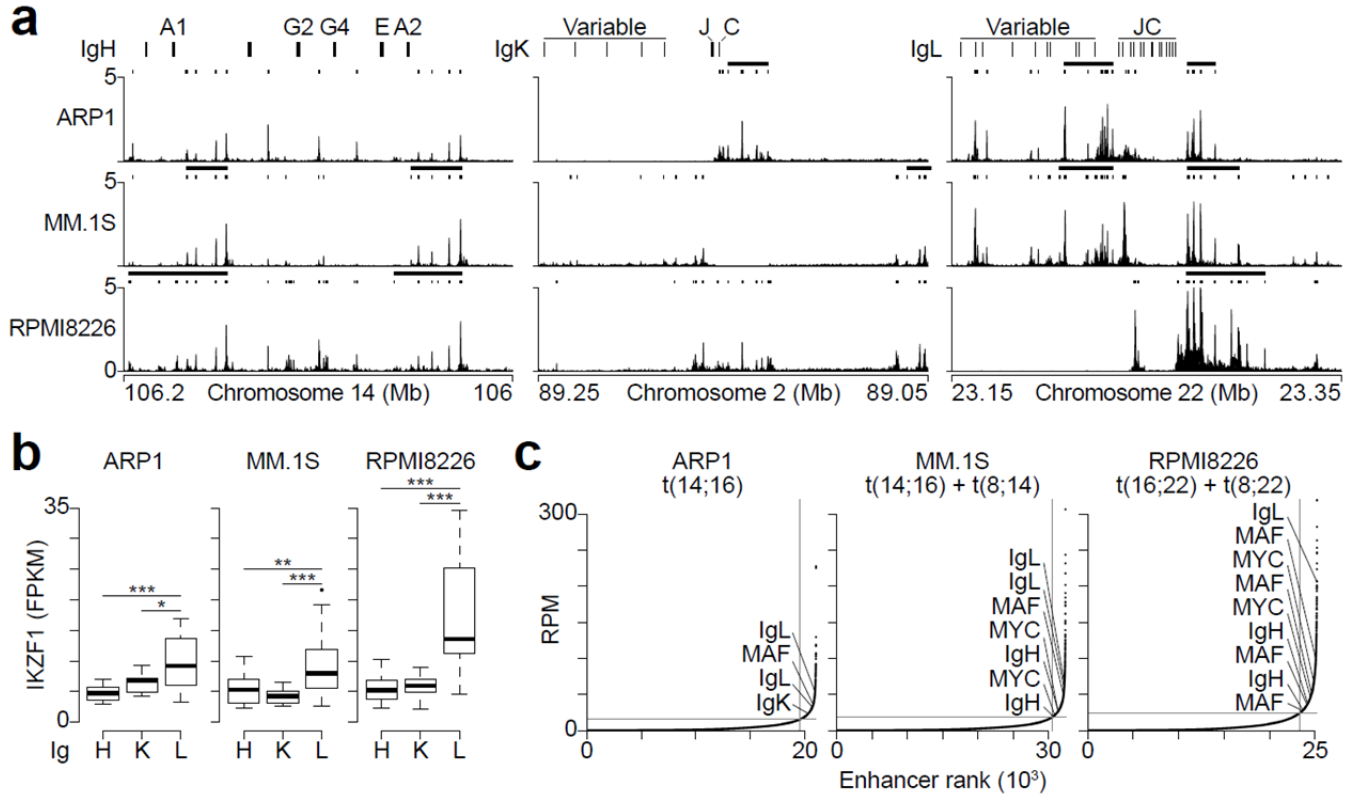

104  
 105 **Figure S8.** IKZF1 binds the IgL locus at some of the highest levels of the myeloma epigenome. **a** ChIP-seq of IKZF1  
 106 at the IgH (left), IgK (middle), and IgL (right) 3' loci for the myeloma cell lines ARP1 (top; IgK-expressing), MM.1S  
 107 (middle; IgL-expressing), and RPMI8226 (bottom; IgL-expressing and IgL-translocated). Regions enriched for  
 108 IKZF1 and high-occupancy clustered regions are denoted above each track and IKZF1 binding is shown on a  
 109 common scale measured in reads per million. Immunoglobulin genes are shown (top) with variable, joining (J),  
 110 and constant (C) regions labelled as well as the IgH constant regions. **b** IKZF1 binding at IgH (H), IgK (K), and IgL  
 111 (L) regions shown in part **a** measured in fragments per kilobase per million (FPKM). Boxplots show the median  
 112 and quartiles with the whiskers extending to the most extreme data point within 1.5 times the interquartile  
 113 range. **c** Ranked order of IKZF1 bound regions in ARP1 (left), MM.1S (middle), and RPMI8226 (right) cells with  
 114 high-occupancy clustered regions labelled for immunoglobulin and translocated loci. Data are shown on the  
 115 GRCh37 genome.

116

# Figure S9

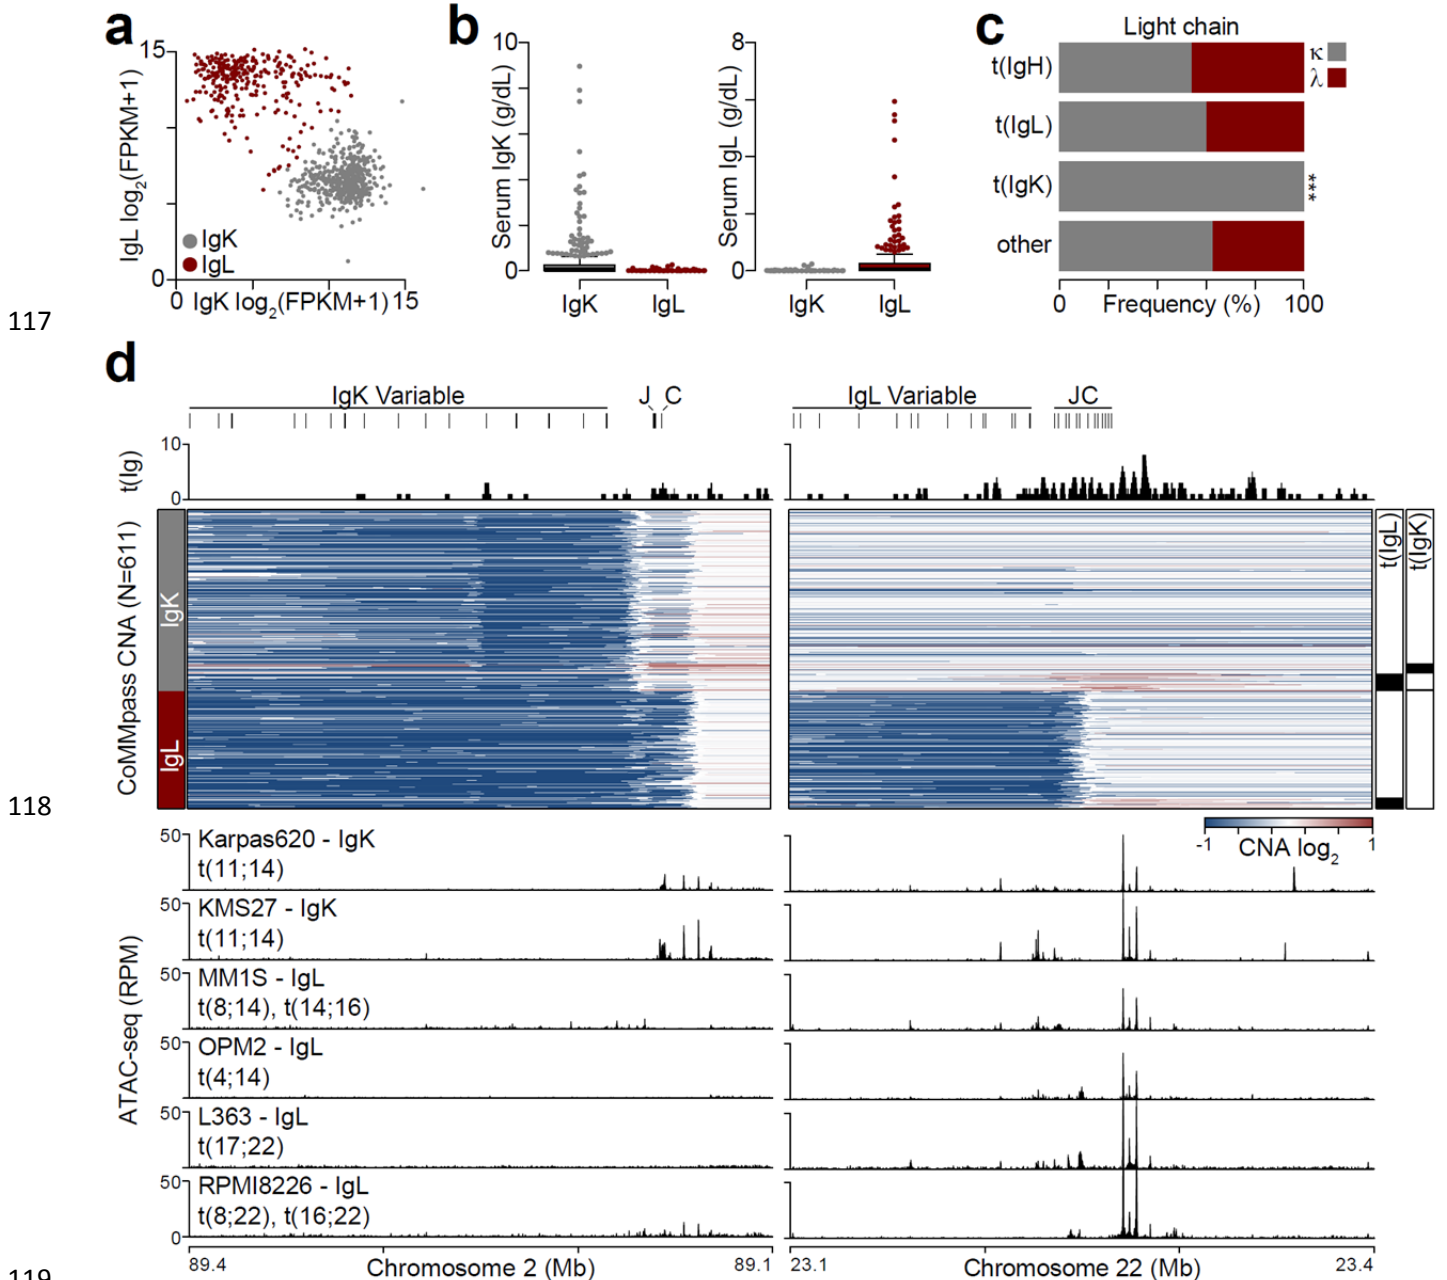

117

118

119

120

121

122

123

124

125

126

127

**Figure S9.** Deletion of the IgK 3' enhancer in IgL expressing myeloma. **a** Plot of immunoglobulin kappa (IgK; gray) and immunoglobulin lambda (IgL; red) expression in 611 newly diagnosed myelomas with whole-genome and RNA-seq data. Color denotes the light chain expressed at the highest level. **b** Serum IgK (left) and IgL (right) for patients that express either IgK or IgL. **c** Frequency of IgK and IgL expression stratified by immunoglobulin translocation. **d** Genome plot of IgK and IgL loci showing translocations (t(Ig); top), copy number alterations (CNA) derived from long-insert whole genome sequencing for IgK-expressing (gray) and IgL-expressing (burgundy) myeloma (middle), and ATAC-seq in IgK and IgL expressing myeloma cell lines (bottom). \*\*\*P <0.001; Fisher's exact test.
